# Supplementary material
Source: PubMed Central journal article supplement (PMC4253857)
Supplement: NIHMS626724-supplement.pdf [file NIHMS626724-supplement.pdf]

# Conformational dynamics and aggregation behavior of piezoelectric diphenylalanine peptides in an external electric field

---

## Supplementary Material

Catherine M. Kelly<sup>1,2,+</sup>, Thomas Northey<sup>1,2,+</sup>, Kate Ryan<sup>1,3</sup>,  
Bernard R. Brooks<sup>4</sup>, Andrei Kholkin<sup>5</sup>, Brian J. Rodriguez<sup>1,3</sup>,  
Nicolae-Viorel Buchete<sup>1,2,\*</sup>

<sup>1</sup>*School of Physics, University College Dublin, Belfield, Dublin 4, Ireland*

<sup>2</sup>*Complex and Adaptive Systems Laboratory,*

*University College Dublin, Belfield, Dublin 4, Ireland*

<sup>3</sup>*Conway Institute of Biomolecular and Biomedical Research,*

*University College Dublin, Belfield, Dublin 4, Ireland*

<sup>4</sup>*Laboratory of Computational Biology, National Heart Lung and Blood Institute,  
National Institutes of Health, Bethesda, Maryland 20892, United States*

<sup>5</sup>*Department of Materials and Ceramic Engineering & CICECO,  
University of Aveiro, Portugal*

Date: August 27<sup>th</sup>, 2014

+ Equal contribution

\* Email: [buchete@ucd.ie](mailto:buchete@ucd.ie)

## Supplementary Material

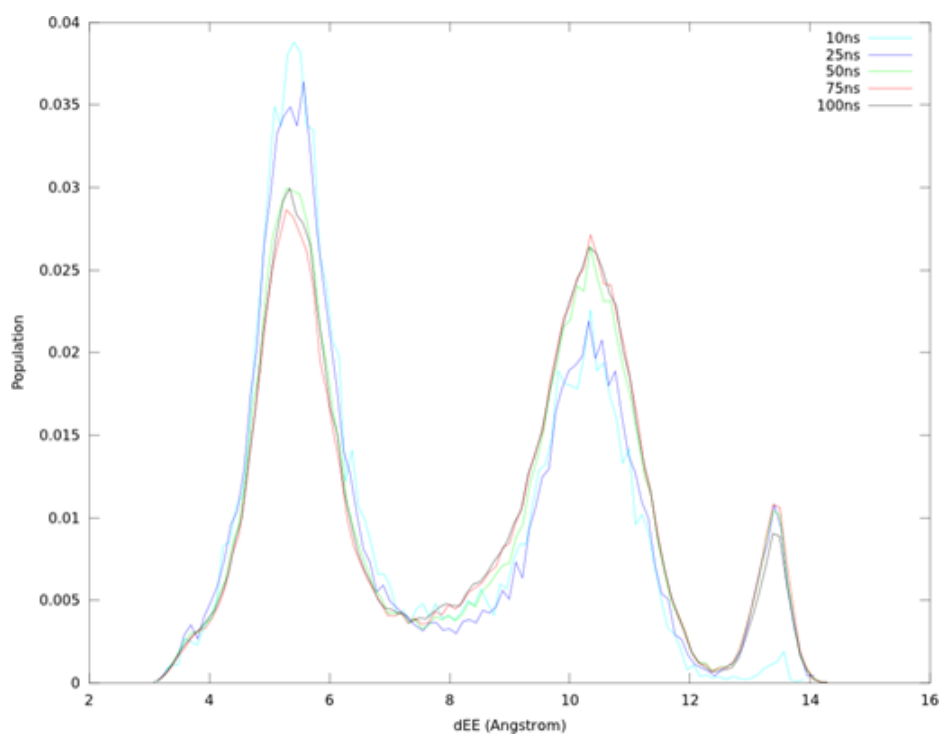

**Figure S1.** Population distribution of the end-to-end distance,  $d_{EE}$ , for the single-FF system with charged termini for different simulation times, 10, 25, 50, 75, 100 ns, showing peak convergence at >50 ns.

## Supplementary Material

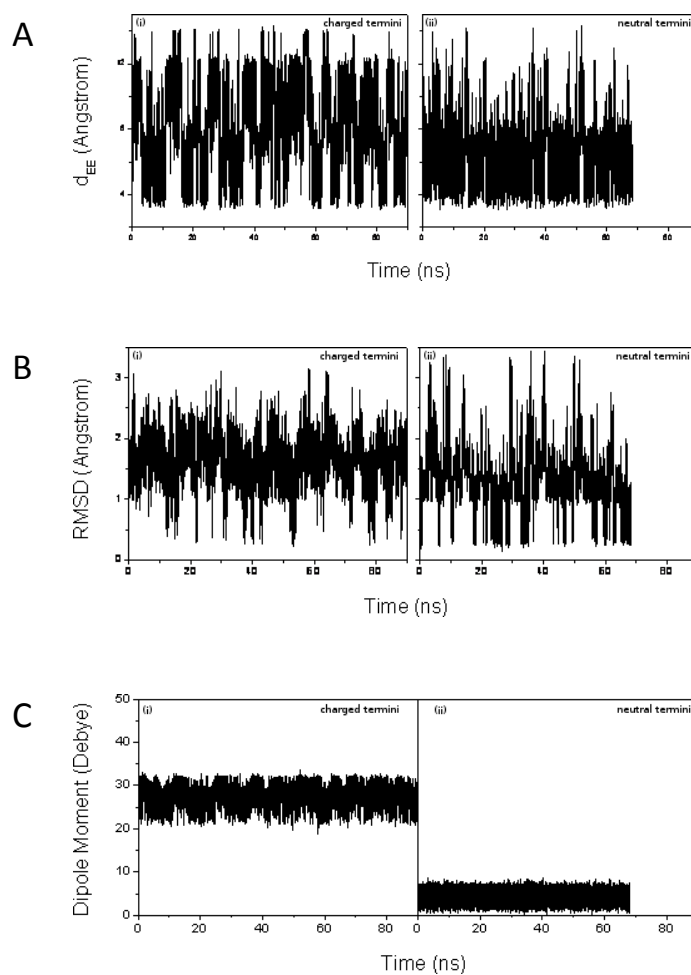

**Figure S2.** The end-to-end distance,  $d_{EE}$ , of the single-FF system with charged termini (A(i)) and neutral termini (A(ii)). RMSDs of non-hydrogen atoms of the single-FF system with respect to its average atomic position with charged termini (B(i)) and with neutral termini (B(ii)). Dipole magnitude over time for the single-FF system with charged (C(i)) and neutral termini (C(ii)).

## Supplementary Material

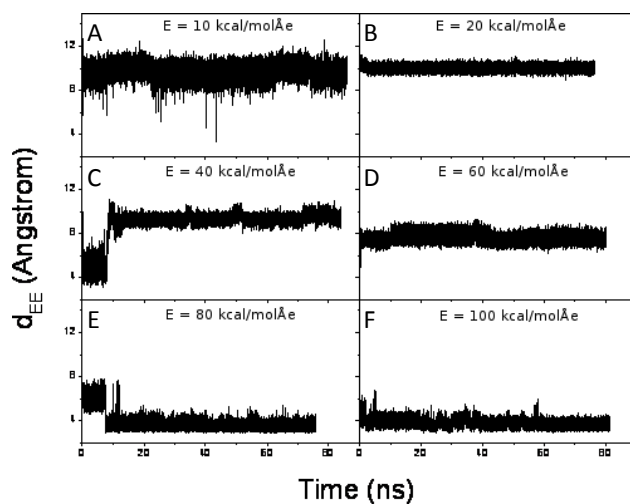

**Figure S3.**  $d_{ee}$  of the single-FF system with field magnitudes  $E = 10, 20, 40, 60, 80, 100$  kcal/(mol Å e).

## Supplementary Material

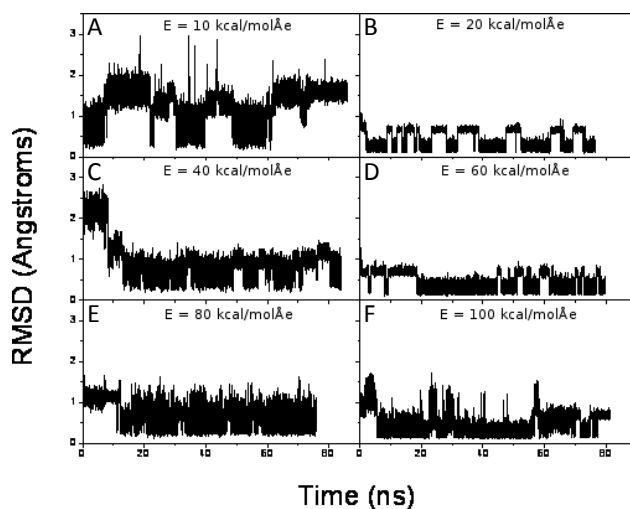

**Figure S4.** RMSDs with respect to the average position of the non-hydrogen atoms in each case for the charged-termini single-FF system with applied electric field magnitudes 10, 20, 40, 60, 80, 100 kcal/(mol Å e).

## Supplementary Material

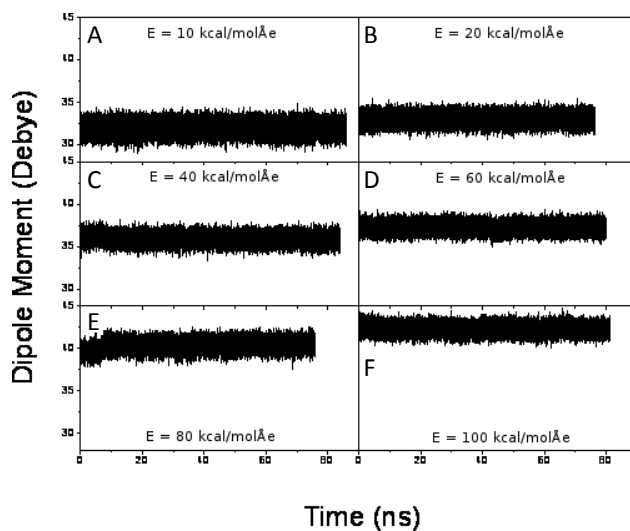

**Figure S5.** Dipole magnitude for the charged-termini single-FF system for each applied field magnitude  $E = 10, 20, 40, 60, 80, 100 \text{ kcal}/(\text{mol } \text{\AA} e)$ .
